# Supplementary material for: Survey of Molecular Mechanisms of Hyperbaric Oxygen in Tissue Repair
Source: MDPI journal article supplement (doi:10.3390/ijms222111754), 2021-10-29
Supplement: s1 [file s1]

Table S1: Molecular mechanisms of HBO according to basic categories

| <b>Substance [alphabetic order]<br/>(Synonym)</b>                         | <b>Acronym<br/>(Synonym)</b> | <b>Location/Function</b>                                                                                                                                                                                                                        | <b>Effect<br/>of<br/>HBO</b> |
|---------------------------------------------------------------------------|------------------------------|-------------------------------------------------------------------------------------------------------------------------------------------------------------------------------------------------------------------------------------------------|------------------------------|
| <b>Transcription</b>                                                      |                              |                                                                                                                                                                                                                                                 |                              |
| Angiogenin<br>(Ribonuclease 5) [48]                                       | ANG<br>(RNASE5)              | Cytosol/Potent factor in neo-angiogenesis; protective factor for motoneurons [9](Kendall 12)                                                                                                                                                    | ↑                            |
| Bach-1                                                                    | Bach-1                       | Nucleus, Cytosol/ regulates production of ROS, cell cycle, hematopoiesis and immunological processes [15] (Huang 2016)                                                                                                                          | ↑                            |
| Brain derived neurotrophic factor (abrineurin) [27]                       | BDNF (ANON2, BULN2)          | Endoplasmatic reticulum (synthesis)/Neuronal growth factor. Supports neuronal survival, enhances growth and differentiation of new neurons and synapses [27] (Chen 2020)                                                                        | ↑                            |
| cAMP response element-binding protein                                     | CREB                         | Nucleus/influence on long-term memory and neuroplasticity [15] (Huang 2016)                                                                                                                                                                     | ↑                            |
| COL2A1-gene                                                               | COL2A1                       | Nucleus/encodes Alpha1 Type 2Collagen [20] (Chen 2016)                                                                                                                                                                                          | ↑                            |
| Dendritic cell-specific transmembrane protein                             | Dc-STAMP                     | Cell membrane/co-regulator in osteoclast development [12] (Al Hadi)                                                                                                                                                                             | ↓                            |
| Epidermal growth factor [7]                                               | EGF                          | Extracellular/Induction of mitosis in epithelial cells. Binds to EGF receptors on cell surface [5](Dhamodharan,)                                                                                                                                | ↑                            |
| Erythropoietin                                                            | EPO                          | Extracellular/by binding to receptors erythropoiesis is induced [43] (Gu)                                                                                                                                                                       | ↑                            |
| Eukaryotic translation initiation factor 4E-binding protein 1             | 4E-BP1                       | Cytosol/mRNA-translation repressor protein, substrate of mTOR [27] (Chen 2020)                                                                                                                                                                  | ↑                            |
| Fibroblast growth factor 2 [49]                                           | FGF-2                        | Cell membrane / proliferation, differentiation and migration of cells [5] (Dhamodharan)                                                                                                                                                         | ↑                            |
| FOS protein [11]                                                          | FOS<br>(AP-1; c-fos)         | Cytosol/ Regulator of cell proliferation, differentiation, and transformation. Factor in angiogenesis [11] (Godman)                                                                                                                             | ↑                            |
| High mobility group protein 1<br>(High mobility group box 1 protein) [50] | HMGP1<br>(HMGB1)             | Nucleus, Cytosol/ secreted into extracellular space by immune cells; mediator of inflammation; active release by microglia; passive release by necrotic neurons. Indicator or life-threatening condition. [4,50,51] (Kang 2014, 2015, Sun 2019) | ↓                            |
| 8-hydroxyguanine [52]                                                     | 8-oxo-Gua                    | Nucleus/ lesion of DNA caused by reactive oxygen species. Can be repaired by 8-oxyguanine DNA glycosylase [52] (Ni 2020).                                                                                                                       | ↓                            |

|                                                                                                           |                  |                                                                                                                                                                                                                                                                                  |    |
|-----------------------------------------------------------------------------------------------------------|------------------|----------------------------------------------------------------------------------------------------------------------------------------------------------------------------------------------------------------------------------------------------------------------------------|----|
| Krüppel-like factor 2                                                                                     | KLF-2            | Cytosol/involved in cardiovascular development; modulates cardiac remodelling; anti-inflammatory, vasoprotective. Inhibited by miR-92a [8,19] (Shyu 2019, 2020)                                                                                                                  | ↑  |
| Kynurenine                                                                                                | Kynurenine       | Extracellular/involved in immune response; psychotropic potential [53] (Bastos)                                                                                                                                                                                                  | ↓  |
| Mechanistic target of rapamycin                                                                           | p-m-TOR (FRAP-1) | Cytosol/ involved in protein synthesis, immunogenity, cellular survival, autophagy, adaptation to stress, motility, proliferation/migration and neuronal plasticity [27,42,54,55] (Liu 2017, Chen 2017, 2020, 2929)                                                              | ↓↑ |
| Metastasis associated lung adenocarcinoma transcript 1 (noncoding nuclear-enriched abundant transcript 2) | MALAT 1 (NEAT 2) | Nucleus/Long noncoding RNA. Triggers induction of cytokines enhancing angiogenesis. Upregulation suppresses miR-92a expression [8,19] (Shyu 2019, 2020)                                                                                                                          | ↑  |
| Micro-RNA 92a                                                                                             | miR-92a          | Extracellular/ Family of micro-RNAs; involved in tumorigenesis and atherosclerosis; induced by stress to endothelia; high levels linked to risk of acute coronary syndrome [8] (Shyu 2019)                                                                                       | ↓  |
| N1-methyladenosine                                                                                        | M1A              | Nucleus, Mitochondria/Nucleosid. Methylation modification on RNA. Protective role in environmental stress [11] (Godman)                                                                                                                                                          | ↑  |
| Nuclear factor of activated T-cells, cytoplasmic 1                                                        | NFATc1           | Cytosol and nucleus/factor in gene transcription during immune response; involved in regulation of bone-mass [12] (Al Hadi)                                                                                                                                                      | ↓  |
| Nuclear erythroid 2-related factor 2                                                                      | Nrf2             | Cytosol/ response to oxidative stress; Activates cytoprotective antioxidative/antitoxic target genes (e.g. EGF, VEGF, PDGF, NQO-1) [5,11,15,29,36,56] (Bai, Hong-Qiang, Huang 2016, Liu 2021, Dhamodharan, Godman)                                                               | ↑  |
| Nuclear factor kappa-B                                                                                    | NF-KappaB        | Cytosol/ Controls DNA transcription, cytokine production, immune response and cell survival (mitochondrial oxphos genes); pro-inflammatory; activated rapidly [29,33,39,48,50,51,4,55,57] (Zhou 2019, Zhang 2013, Bai, Chen 2017, Kang 2014,2015, Sun 2019, Tan 2014, Yang 2013) | ↓  |
| P53                                                                                                       | p53 (LFS1)       | Cytosol, Nucleus/Prevents uncontrolled cellular proliferation, enhances cell repair, able to stop cell cycle. Reduced activity linked to higher longevity. [27,46] (Chen 2020, Zhang 08)                                                                                         | ↓  |
| Platelet derived growth factor                                                                            | PDGF             | Platelets. Release into serum after platelet damage / Instigates wound healing, decreases scarring [5] (Dhamodharan)                                                                                                                                                             | ↑  |
| Protein fosB (G0/G1 switch regulatory protein 3)                                                          | FOSB (G0S3)      | Nucleus/Regulator of cell proliferation, differentiation, and transformation. Involved in angiogenesis [11] (Godman)                                                                                                                                                             | ↑  |

|                                                                                                |                          |                                                                                                                                                                                                                                                                                                                              |    |
|------------------------------------------------------------------------------------------------|--------------------------|------------------------------------------------------------------------------------------------------------------------------------------------------------------------------------------------------------------------------------------------------------------------------------------------------------------------------|----|
| Protein kinase B                                                                               | Akt; p-Akt               | Cytosol/Protein essential for cell survival. After activation by phosphorylation Akt inhibits the expression of cell death genes, while enhancing transcription of anti-apoptotic genes [27,35,39,20,55] (Zhou 2019, Chen 2016, 17, 20, He 2019)                                                                             | ↑↓ |
| Receptor activator of NF-KappaB                                                                | RANK                     | Cell membrane/Transmembrane protein of osteoclasts; induces resorption of bone [12] (Al Hadi)                                                                                                                                                                                                                                | ↓  |
| Runt-related transcription factor 2                                                            | Runx 2                   | Cytosol/Master regulator of bone development [13] (Lin 2014)                                                                                                                                                                                                                                                                 | ↑  |
| Signal transducer and activator of transcription 1                                             | STAT-1                   | Cytosol-Nucleus/pro-inflammatory transcription factor involved in antibacterial/antiviral response; activated by ischemia-reperfusion or interferons; involved in brain pathologies [58] (Wang 2019)                                                                                                                         | ↓  |
| TGFB-induced factor (transforming growth factor β)                                             | TGIF                     | Extracellular/ Produced by blood-cells. Immune and stem cell regulation and differentiation. Involved in development of nerve system and in neuronal survival [45] (Wee 2015)                                                                                                                                                | ↓  |
| Transcription factor JUNB                                                                      | JUNB                     | Cytosol/Regulation of gene activity following primary response to growth factor [11] (Godman)                                                                                                                                                                                                                                | ↑  |
| Tumor necrosis factor alpha (Tumor necrosis factor ligand superfamily member 2)                | TNF-Alpha (TNFSF2)       | Extracellular/Downstream agent of Toll-like receptor 4. Secreted predominantly by macrophages. Complex function. Pro-inflammatory cytokine involved in apoptosis but also proliferation; induces fever [33,44,45,49,57,58-63] (Zhang 13, Wee 15, Poyrazoglu, Yang 01, Ding, Wu 18, Zhao 17, Tan 14, Wang 19, Lim 17, Liu 16) | ↓  |
| Vascular endothelial growth factor                                                             | VEGF                     | Extracellular/Group of signaling molecules instigating angiogenesis and vasodilation after binding to tyrosinkinase receptor on cell surface; Subset may cause chronicity of wound [38,5,46,64] (Liu 2014, Dharmodharan, Zhang 2008, Yang 2017)                                                                              | ↑↓ |
| Wnt family member 3a                                                                           | Wnt-3a                   | Extracellular/Protein involved in skeletal differentiation and development; maintenance of bone-mass [13] (Lin 2014)                                                                                                                                                                                                         | ↑  |
| Wnt family member 10a                                                                          | Wnt-10a (OODD)           | Extracellular/Protein involved in patterning during embryogenesis; deficiency is related to epidermal dysplasia syndromes. Signaling pathway with catenin beta. [61] (Zhao 2017)                                                                                                                                             | ↓  |
| <b>Vascular Signaling and Stress</b>                                                           |                          |                                                                                                                                                                                                                                                                                                                              |    |
| Catalase                                                                                       | CAT                      | Peroxisomes/Reduction of hydrogen peroxide to water and oxygen [30,65-67]                                                                                                                                                                                                                                                    | ↑  |
| C-Jun-N terminal kinases (mitogen activated proteinkinase-8; stress activated phospho-kinases) | JNK (MAPK8; SAPK; PRKM8) | Cytosol/ "stress induced kinases" activated by mitogens, interleukins, ROS; enhance neurodegeneration and neuronal apoptosis [57,58] (Zhang, 2013, Wang 2019)                                                                                                                                                                | ↓  |

|                                                                                  |                    |                                                                                                                                                                                                                                           |    |
|----------------------------------------------------------------------------------|--------------------|-------------------------------------------------------------------------------------------------------------------------------------------------------------------------------------------------------------------------------------------|----|
| Cluster of differentiation 44                                                    | CD44               | Cell membrane/participates in lymphocyte activation; various other functions [57] (Zhang 2013)                                                                                                                                            | ↓  |
| Cyclooxygenase 2<br>(Prostaglandin synthase 2)                                   | COX-2<br>(PGHS-2)  | Endoplasmatic reticulum, Golgi apparatus, inner layer of cell membrane/Pathogen-inducible oxygenase, triggered by mitogens, cytokines, inflammation or trauma. Induces formation of Prostaglandin [30,39,46], Zhou 2019, Zhang 08, Shams) | ↓  |
| Endothelial nitric oxide gene expression                                         | eNOS               | Cytosol/Antithrombotic, vasoprotective, cardio protective, vasodilation [48] (Yang 2013)                                                                                                                                                  | ↑  |
| Epidermal growth factor                                                          | EGF                | Extracellular/Induction of mitosis in epithelial cells. Binds to EGF receptors on cell surface [5](Dhamodharan,)                                                                                                                          | ↑  |
| Extracellular signal-regulated protein kinase                                    | ERK                | Cytosol, Nucleus/ERK participates in the Ras-Raf-MEK-ERK pathway (chain of proteins transferring signals from receptor on cell surface to intranuclear DNA). Regulates growth and differentiation [15](Huang 2016)                        | ↑  |
| Glutamate cysteine ligase catalytic subunit (Gamma-glutamylcysteine synthetase ) | GCLC               | Cytosol/ target of Nrf2. Required for Glutathione synthesis as rate-limiting step [36] (Liu 2021)                                                                                                                                         | ↑  |
| Glutathione (reduced, oxidized)                                                  | GSH                | Cytosol and organelles/Potent antioxidant. Biotransformation of noxious substances. Depletion of GSH is linked to oxidative stress [36,52,65,66] (Oliveira, Kudchodkar, Liu 2021, Ni 2020)                                                | ↑↓ |
| Glutathione Peroxidases                                                          | GSH-Px             | Cytosol and extracellular/ 8 Isoforms. Catalyses reduction of organic peroxides (e.g. lipid peroxides) or hydroperoxides. [66] (Kudchodkar)                                                                                               | ↑  |
| Glycogen synthase kinase-3                                                       | GSK3<br>beta       | Cytosol/Inactivates glycogen synthase. Involved in proliferation, differentiation, energy metabolism, neuronal development [35,13] (Lin 2014, He 2019)                                                                                    | ↑↓ |
| Heat shock protein 27 (heat shock protein beta-1)                                | HSP27<br>(HSPB1)   | Cytosol/ Chaperone protein (initiates correct folding and activation of proteins), anti-apoptotic; enhances cell survival under stress conditions [16] (Huang 2014)                                                                       | ↑  |
| Heat shock protein 70                                                            | HSP70              | Cytosol/ Chaperone protein (stabilizes and facilitates correct folding of proteins), enhances cell survival; interacts with HSP90 [16] (Huang 2014)                                                                                       | ↑  |
| Heat shock 70 kDa protein 1 (Heat shock protein 72)                              | HSPA 1A<br>(HSP72) | Cytosol/ Chaperone protein (stabilizes and facilitates correct folding of proteins), anti-apoptotic. Increases insulin sensitivity. [11] (Godman 2010)                                                                                    | ↑  |
| Heat shock protein 90                                                            | HSP90              | Cytosol/Ubiquitous chaperone (folding and activation of proteins); enhances cell survival; interacts with HSP70 [16] (Huang 2014)                                                                                                         | ↑  |

|                                                                             |                                |                                                                                                                                                                                                                                                                                       |    |
|-----------------------------------------------------------------------------|--------------------------------|---------------------------------------------------------------------------------------------------------------------------------------------------------------------------------------------------------------------------------------------------------------------------------------|----|
| Hypoxia- inducible factor 1-<br>alpha                                       | HIF-1alpha<br>(HIF1A)          | Cytosol/Central regulator of cellular response to oxygen levels (e.g. angiogenesis, erythropoiesis, cell proliferation, repair, inflammation) by interaction with >60 genes; mediates anaerobic glycolysis [18,43,46,12,53,68] (Al Hadi, Bastos, Huang 2007, Sunkari, Zhang 2008, Gu) | ↓↑ |
| Heme oxygenase-1<br>(Heat shock protein 32)                                 | HO-1<br>(HMOX1;<br>HSP32)      | Endoplasmatic Reticulum, mitochondria a.o /Protects cells by reducing superoxide and other reactive oxygen species [15,11,29,36,56,57,69,70,14] (Zhang 2013, Bai, Hong-Quiang, Huang 2016, Liu 2021, Godman 2010, Nesovic, Huang 2005, Rothfuss)                                      | ↑  |
| Inducible nitric oxide synthase<br>(Nitric oxide synthase 2)                | i-NOS<br>(NOS-2,<br>HEP-NOS)   | Cytosol/Inducible by stress and oxygen balance; catalyzes superoxide production. Synthesizes Nitric Oxide (NO), a free radical acting also as neurotransmitter [39,60,70,71] (Zhou 2019, Gajendrareddy, Ding 2018, Huang 2005)                                                        | ↓  |
| Malondialdehyde<br>(Propandial)                                             | MDA                            | Cytosol, nucleus/product of peroxidation of unsaturated fatty acids; marker of oxidative stress; interacts with functional groups of proteins, lipoproteins, DNA, and RNA [57] (Zhang 2013, Bai, Liu 2021, Poyrazoglu, Sun 2017, Ni 2020)[28,29,36,44,52]                             | ↓  |
| Matrix Metalloproteinase-2<br>(72 kDa type IV collagenase;<br>gelatinase A) | MMP-2<br>(CLG4A)               | Cell membrane/role in embryonic development, tissue remodeling, angiogenesis and cell migration [72] (Zhao 2011)                                                                                                                                                                      | ↓  |
| Matrix Metalloproteinase-9 (92<br>kDa gelatinase; <u>gelatinase B</u> )     | MMP-9<br>(GELB)                | Cell membrane/Active form prevents healing; promoted by ROS and proteases. Upregulated after intracerebral hemorrhage; aggravates ROS-production, edema and neuronal degradation [37,57,58,67,72,73] ( Zhao 2011, Veltkamp, Nguyen, Wang 19, Chen 14)                                 | ↓  |
| Myeloperoxidase                                                             | MPO                            | Cytosol/Expressed mainly by neutrophils and monocytes; regulates and terminates inflammatory processes by oxidative burst; binds to surface of apoptotic cells [57,29,44,74] ( Zhang 2013, Bai, Poyrazoglu, Wang 16)                                                                  | ↓  |
| Mitogen activated protein<br>kinase kinase                                  | MEK 1 / 2<br>(MAPK2;<br>MAPKK) | Cytosol/ regulates response to mitogens, stress or inflammation; modulates proliferation, gene expression, differentiation and cell survival. Blocking MEK instigates apoptosis [57,15,64] (Zhang 2013, Huang 2016, Yang 2017)                                                        | ↑  |
| NADH-quinone oxyreductase-1                                                 | NQO-1                          | Cytosol, mitochondria/ Target of Nrf2. Prevents reduction of quinones that results in the production of radical species [29] (Bai).                                                                                                                                                   | ↑  |
| Nicotinamide adenine<br>dinucleotide phosphate oxidase                      | NADPH-<br>oxidase              | Cell membrane/Catalyzes formation of oxygen free radicals [57] (Zhang 2013)                                                                                                                                                                                                           | ↓  |

|                                                              |               |                                                                                                                                                                                                                                                  |    |
|--------------------------------------------------------------|---------------|--------------------------------------------------------------------------------------------------------------------------------------------------------------------------------------------------------------------------------------------------|----|
| Nitric oxide (endothelium derived relaxing factor)           | NO (EDRF)     | Free radical, causes vasodilation [57,15,75,71] (Zhang 2013, Huang 2016, Zelinski, Gajendrareddy)                                                                                                                                                | ↑  |
| Phosphoinositid 3 Kinase                                     | PI3K          | Cytosol/phosphorylation and activation of Akt in the PI3K-Akt-m-Tor pathway [20] (Chen 2016)                                                                                                                                                     | ↑  |
| Protein kinase B (phosphorylated Akt)                        | Akt; p-Akt    | Cytosol/Protein essential for cell survival. After activation by phosphorylation Akt inhibits the expression of cell death genes, while enhancing transcription of anti-apoptotic ones. [39,42,20,55,35] (Zhou 2019, Chen 2016, 17, 20, He 2019) | ↑↓ |
| Rapidly accelerated fibrosarcoma                             | Raf-1 (C-Raf) | Cytosol/Proteinkinase; activates the MEK 1 /2 pathway; involved in cellular growth, proliferation and differentiation [64] (Yang 17)                                                                                                             | ↑  |
| Receptor for advanced glycation end products                 | RAGE          | Cell membrane/Provokes ROS generation in neurones. Depending on activity cell survival and differentiation or apoptosis are induced [74] (Wang 16)                                                                                               | ↓  |
| Reactive oxygen species                                      | ROS           | Mitochondria/By-product of oxidative phosphorylation; antiviral/antibacterial action. Dose-dependent effect (low: beneficial; high: noxious=oxidative stress). Increased in e.g. ischemia/reperfusion [15,67,52] (Huang 2016, Nguyen, Ni 2020)   | ↓↑ |
| S-100 proteins                                               | S-100         | Cytosol, extracellular/Group of calcium-binding proteins; present in variety of cells deriving from neural crest. Multiple functions (eg. growth, differentiation, inflammatory response) [30] (Shams 2017)                                      | ↑  |
| Superoxide dismutase                                         | SOD           | Cytosol/Reduction of superoxide anions to hydrogen peroxide [65,28,29,30,36,44,52,57] (Oliveira, Zhang 2013, Bai Liu 21, Nguyen, Poyrazoglu, Shams, Sun 17, Ni 20)                                                                               | ↑  |
| Thiobarbituric acid reactive substances                      | TBARS         | Cytosol/products of lipide-peroxidation; markers of oxidative stress (MDA is one proponent) [66] (Kudchodkar)                                                                                                                                    | ↓  |
| Vascular endothelial growth factor                           | VEGF          | Serum/Group of molecules instigating angiogenesis and vasodilation after binding to tyrosinkinase receptor on cell surface; subset may cause chronicity of wound [38,5,46,64] (Liu 2014, Dharmodharan, Zhang 2008, Yang 2017)                    | ↑↓ |
| Vascular endothelial growth factor receptor 2                | VEGFR2        | Cell membrane/ Regulator of permeability, proliferation, invasion and migration. [64] (Yang 2017)                                                                                                                                                | ↑  |
| <b>(vascular) Adhesion, Cell-to-Cell Contacts, Structure</b> |               |                                                                                                                                                                                                                                                  |    |
| Actin alpha cardiac muscle                                   | ACTC1 (ACTC)  | Cytosol, Cytoskeleton/Encodes cardiac muscle alpha actin; involved in cell motility (Godman [11] 10)                                                                                                                                             | ↑  |

|                                                         |                                    |                                                                                                                                                                                                                      |    |
|---------------------------------------------------------|------------------------------------|----------------------------------------------------------------------------------------------------------------------------------------------------------------------------------------------------------------------|----|
| Alpha-4beta-1 integrin (very late activation antigen 4) | VLA-4<br>(CD49DCD29)               | Cell membrane/Part of adhesion molecule in leucocytes and their progenitors. Enables cell adhesion and migration [6] Baiula 20)                                                                                      | ↓  |
| Beta catenin-1                                          | CTNNB1                             | Cytosol/Pro-proliferative and pro-survival of cells. Coordinates and regulates cell to cell adhesion and gene transcription [13,35] (Lin 2014, He 2019)                                                              | ↑  |
| Beta-2 integrin                                         | CD18                               | Cell surface receptor / leucocytes. Enables cell adhesion and leucodiapedesis [76] (Baiula)                                                                                                                          | ↓  |
| Caveolin-1                                              | CAV-1<br>(BSCL3, CGL3, LCCNS a.o.) | Cell membrane/Scaffolding protein; promotes cell cycle progression [31] (Li 2018)                                                                                                                                    | ↑  |
| Claudin-1                                               | CLDN1                              | Cell membrane/component of tight junction strands; interacts with other Claudins [36,72] (Liu 21, Zhao 2011)                                                                                                         | ↑  |
| Claudin-5                                               | CLDN5                              | Cell membrane/component of tight junctions [72,37] (Zhao 2011, Chen 14)                                                                                                                                              | ↑  |
| Cluster of differentiation 40                           | CD40                               | Cell membrane/Surface protein in antigen presenting cells, required for their activation; activates microglia [34] (Lavrnja)                                                                                         | ↓  |
| Connexin                                                | CX                                 | Cell membrane/transmembrane protein at gap junctions facilitating protein transfer. In neurons and glial cells [38] (Liu X)                                                                                          | ↑↓ |
| Dynamin related protein 1 (Dynamin like protein 1)      | Drp 1<br>(DLP1; NM1L)              | Mitochondria/GTP-ase, regulating mitochondrial fission. After phosphorylation Drp1 stimulates mitochondrial fission during mitosis. [52] (Ni 20)                                                                     | ↓  |
| E-Cadherin (epithelial-calcium adhering protein)        | ECAD                               | Cell membrane/Adhesion- and signaling, component of tight junctions and desmosomes, mainly in epithelia [36] (Liu 21)                                                                                                | ↑  |
| Galectin-3 (Lectin galactoside binding soluble 3)       | GAL-3<br>(LGALS-3)                 | Nucleus, cytosol, mitochondria, extracellular/ influences cellular attraction and adhesion, cell cycle and apoptosis. Upregulated in fibrosis and heart failure [49,76] (Wu 18, Fu17)                                | ↓  |
| Glial fibrillary acidic protein                         | GFAP                               | Cytoskeleton/(astrocytes); necessary for integrity of blood-brain barrier, neuron-glia homeostasis and communication, formation of glial scars. Trauma may induce reactive astrogliosis [39,34] (Zhou 2019, Lavrnja) | ↓  |
| Integrin AlphaM/CD11b                                   | ITGAM                              | Cell membrane/Surface protein of leucocytes involved in the innate immune system (monocytes, granulocytes, macrophages, natural killer cells) and of microglia [62] (Lim 17)                                         | ↑  |

|                                                                               |                  |                                                                                                                                                                                                                                                   |    |
|-------------------------------------------------------------------------------|------------------|---------------------------------------------------------------------------------------------------------------------------------------------------------------------------------------------------------------------------------------------------|----|
| Intracellular adhesion molecule 1 (Cluster of Differentiation 54)             | ICAM-1 (CD54)    | Cell membrane/Downstream agent of TLR4/NF- $\kappa$ B; when activated by cytokines it binds to neutrophils, enabling their migration into tissues [10,63,77,34] (Kendall 13, Zhao 20, Liu 16, Lavrnja)                                            | ↓  |
| Kindlin-1                                                                     | Kindlin-1        | Cell membrane/Binds to integrins and regulates integrin activation at cell adhesions. Regulates WNT and TGF-signaling [61] (Zhao 17)                                                                                                              | ↓  |
| Microtubule-associated proteins 1A/1B light chain 3B                          | LC3II (MAP1LC3B) | Cytosol, autophagosomes; activated form of LC-3 / Mediates autophagosome biogenesis; involved in degradation of cytoplasmic components (exact role not yet defined) [40,55,27,78,79] (Liu 19, Chen 17, 20, Sun 16, Bao)                           | ↑↓ |
| Occludin                                                                      | OCLN             | Cell membrane/tight junction component; preserves barrier function of epithelia [32] (Liu 20)                                                                                                                                                     | ↑  |
| Platelet endothelial cell adhesion molecule 1 (Cluster of differentiation 31) | PECAM-1 (CD 31)  | Cell membrane/variety of cells; involved in cardiovascular development, angiogenesis, leucocyte migration and elimination of aged neutrophils; mediates endothelial-cardiomyocyte communication; regulation of cardiac function. [19] (Shyu 2020) | ↑  |
| Protein kinase B (phosphorylated Akt)                                         | p-Akt            | Cytosol/Protein essential for cell survival. After activation by phosphorylation Akt inhibits expression of cell death genes, while enhancing transcription of anti-apoptotic ones. [39,20,55,27,35] (Zhou 2019, Chen 2016, 17, 20; He 2019)      | ↑↓ |
| Rho-Kinase 1                                                                  | ROCK1            | Cytosol, Golgi apparatus, Thrombocytes/ Regulates cytoskeleton (Aktin), motility and cell adhesion [32] (Liu 20)                                                                                                                                  | ↓  |
| Vascular cell adhesion molecule 1 (Cluster of differentiation 106)            | VCAM-1 (CD106)   | Cell membrane/Endothelia; adhesion molecule, activated by cytokines. Mediates the adhesion of eosinophils, basophils, lymphocytes and monocytes to vascular endothelium [10,77] (Kendall 13, Zhao 20)                                             | ↓  |
| Vimentin                                                                      | VIM              | Cytoskeleton of mesenchymal cells/Anchoring of organelles in the cytosol and maintenance of cell shape. Vimentin attaches to the nucleus, endoplasmic reticulum, and mitochondria. [34] (Lavrnja)                                                 | ↓  |
| Zonula occludens-1 (Tight junction protein-1)                                 | ZO-1 (TJP-1)     | Cell membrane/Transmembrane scaffold protein; cross-links and anchors tight junction proteins [80,32,37] (Liu 18, 20, Chen 14)                                                                                                                    | ↑  |
| <b>Apoptosis, Autophagy, Cell death</b>                                       |                  |                                                                                                                                                                                                                                                   |    |
| Anti-apoptotic B cell lymphoma-2                                              | Bcl-2            | Mitochondria/Downregulation of apoptosis [68,46,69,37] (Huang 2007, Zhang 08, Nesovic, Chen 14)                                                                                                                                                   | ↑  |
| Apoptosis-associated speck-like protein containing a CARD                     | ASC (PYCARD)     | Nucleus/Part of inflammasome in monocytes and macrophages, required for activation of Caspase-1 [81] (Liang 15)                                                                                                                                   | ↓  |



|                                                                                                                                                                |                                |                                                                                                                                                                                                                                                |  |     |
|----------------------------------------------------------------------------------------------------------------------------------------------------------------|--------------------------------|------------------------------------------------------------------------------------------------------------------------------------------------------------------------------------------------------------------------------------------------|--|-----|
| (caspase activation and recruitment domain) domain                                                                                                             |                                |                                                                                                                                                                                                                                                |  |     |
| Apoptosis inducing factor                                                                                                                                      | AIF                            | Mitochondria/causes fragmentation of DNA; induces apoptosis independent from caspase 3 [82] (Liu 2013)                                                                                                                                         |  | ↓   |
| Autophagy related 5 protein                                                                                                                                    | ATG5                           | Membrane of autophagosomes/ promotes autophagy and cell cycle arrest [27] (Chen 20)                                                                                                                                                            |  | ↓   |
| Bcl-2-associated X protein                                                                                                                                     | Bax                            | Membrane of mitochondria /pro-apoptotic [37,68] (Huang 2007, Chen 2014)                                                                                                                                                                        |  | ↓   |
| Beclin-1 (Autophagy related gene 6)                                                                                                                            | BECN1 (ATG6)                   | Cytosol/Multifunctional protein; involved in autophagy processes [55,78] (Chen 17, Sun 16)                                                                                                                                                     |  | ↓ ↑ |
| Caspase-1 (Interleukin converting enzyme)                                                                                                                      | ICE                            | Cytosol/Activated by inflammasomes, Caspase-1 converts pro-inflammatory interleukins (IL-1beta, IL-18) to active form [81] (Liang 15)                                                                                                          |  | ↓   |
| Caspase 3 (Cystein aspartic acid protease)                                                                                                                     | CASP3                          | Cytosol/mediates and effects apoptosis; activates Caspase 6; present in neuronal or cardiomyocytic cell death [82,30,41,52,37] (Liu 2013, Shams, Pan 18, Ni 20, Chen 14))                                                                      |  | ↓   |
| Caspase 6 (Cystein aspartic acid protease)                                                                                                                     | CASP6                          | Cytosol/mediates apoptosis and neurodegeneration [52] (Ni 20)                                                                                                                                                                                  |  | ↓   |
| Cysteine aspartic acid proteases 7/8/12                                                                                                                        | Caspases 7/8/12                | Cytosol/mediates and effects apoptosis; activates Caspase 6; present in neuronal or cardiomyocytic cell death. Activated enzymes are indiscriminately pro apoptotic [41] (Pan 18)                                                              |  | ↓   |
| Cleaved caspase 3/pro cleaved caspase 3                                                                                                                        | C3/pro-C3                      | Cytosol/ Fragment of activated Caspase 3, mediates and effects apoptosis; activates Caspase 6; present in neuronal or cardiomyocytic cell death [37,46,76] (Chen 14, Zhang 08, Fu 08)                                                          |  | ↓   |
| Cryopyrin (Neuronal apoptosis inhibitor protein; NACHT domain leucine-rich-repeat and pyrin domain containing protein 3; NLR family pyrin domain containing 3) | NLRP-3 (NACHT; NAIP; LRR; PYD) | Cytosol/Component of innate immune system; interacts with components of damaged cells; forms NLRP-inflammasome with ASC (Apoptosis-associated speck-like protein containing a CARD), thereby inducing inflammation [81,83] (Liang 15, Qian 17) |  | ↓   |
| Cytochrome C                                                                                                                                                   | CYC                            | Intramitochondrial/ Involved in oxidative phosphorylation. Cell injury causes excretion into cytosol thereby inducing apoptosis [76] (Fu 17)                                                                                                   |  | ↓   |
| Microtubule-associated protein 1A/1B-light chain 3B                                                                                                            | LC3II (MAP1LC3B)               | Cytosol, autophagosomes/ Mediates autophagosome biogenesis; involved in degradation of cytoplasmic components (exact role not yet defined) ) [40,55,27,78,79] (Liu 19, Chen 17, 20, Sun 16, Bao)                                               |  | ↑↓  |

|                                                                      |                              |                                                                                                                                                                                                                                                                                                 |    |
|----------------------------------------------------------------------|------------------------------|-------------------------------------------------------------------------------------------------------------------------------------------------------------------------------------------------------------------------------------------------------------------------------------------------|----|
| Mechanistic target of Rapamycin                                      | m-TOR (FRAP-1)               | Cytosol/ involved in protein synthesis, immunogenity, cellular survival, autophagy, adaptation to stress, motility, proliferation/migration and neuronal plasticity [54,55,27,42] (Liu 2017, Chen 2017, 2020, 2020)                                                                             | ↑↓ |
| Sirtuin 1                                                            | SIRT-1                       | Nucleus, mitochondria, cytosol/curbs apoptosis, lysis of adipocytes; increases longevity [56] (Hong-Qiang                                                                                                                                                                                       | ↑  |
| <b>Inflammation</b>                                                  |                              |                                                                                                                                                                                                                                                                                                 |    |
| Complement component 3                                               | C3                           | Extracellular/Required for complement activation pathways; Complement involved in antibacterial host defense mechanisms, immune response and hemostasis [77] (Zhao 20)                                                                                                                          | ↓  |
| Cyclooxygenase 2 (Prostaglandinsynthase 2)                           | COX-2 (PTGS2)                | Intracellular multiple sites/induced by trauma or inflammation; synthesis of prostaglandin causes fever and pain [84,46,30] ( Zhou, 2019, Zhang 08, Shams)                                                                                                                                      | ↓  |
| CxC motiv chemokine 10 (interferon gamma induced protein)            | CXCL10                       | Extracellular/Chemokine attracting immunocompetent cells at site of inflammation. Secretion induced by interferon gamma. Enhances angiogenesis [5] (Dharmodharan, Chen 14)                                                                                                                      | ↑  |
| Epithelial LPS-mediated nuclear factor x03BA; B                      | NF-x03BA; B                  | Nucleus/Signaling pathway with Toll-like receptor 4 [63] (Liu 2016)                                                                                                                                                                                                                             | ↓  |
| High mobility group protein 1 (High mobility group box 1 protein)    | HMGP1 (HMGB1)                | Nucleus, Cytosol/ secreted into extracellular space by immune cells/regulates transcription of DNA by steric changes; Cytokine mediator of inflammation; active release by microglia; passive release by necrotic neurons. Indicator or life-threatening condition (Kang 2014, 2015, Sun 2019). | ↓  |
| Hypoxia inducible factor 1 alpha subunit                             | HIF-1alpha (HIF1A)           | Cytosol/Central regulator of cellular response to oxygen levels (e.g. angiogenesis, erythropoiesis, cell proliferation, repair, inflammation) by interaction with >60 genes (Al Hadi, Bastos, Huang 2007, Sunkari, Zhang 2008, Gu)                                                              | ↑↓ |
| Interleukin 1beta (leucocytic pyrogen; lymphocyte activating factor) | IL-1beta (IL-1; IL1B; IL1F2) | Extracellular/Pro-inflammatory cytokine; induces fever; regulates differentiation, proliferation and apoptosis; triggers further inflammation mediators (Zhang, 2013, Chen 2016 , Ding, Wu 18, Liang 15, Tan 14, Wang 19, Qian 17 Chen 14, Liu 16)                                              | ↓  |
| Interleukin-6 (Interferon beta 2)                                    | IL-6 (IFNB2)                 | Extracellular/Pro-inflammatory cytokine. Mediates and modulates cellular response; regulates apoptosis and proliferation of neutrophils and leucocytes (Poyrazoglu, Bao, Liu 16, Chen 14)                                                                                                       | ↓↑ |
| Interleukin 8 (CxC motiv chemokine ligand 8)                         | IL-8 (CXCL8)                 | Extracellular/Chemokine attracting mainly neutrophils during inflammation; angiogenetic (Dharmodharan, Kendall 12)                                                                                                                                                                              | ↓↑ |

|                                                                                                                                                                |                                  |                                                                                                                                                                                                                                                      |     |
|----------------------------------------------------------------------------------------------------------------------------------------------------------------|----------------------------------|------------------------------------------------------------------------------------------------------------------------------------------------------------------------------------------------------------------------------------------------------|-----|
| Interleukin- 10<br>(Cytokine-synthesis inhibitory factor)                                                                                                      | IL-10<br>(CSIF)                  | Extracellular/Anti-inflammatory cytokine; downregulation of cytokine cascades; blocks NF-KappaB; enhances immunotolerance (Poyrazoglu, Chen 14)                                                                                                      | ↓ ↑ |
| Interleukin 18 (interferon gamma inducing factor)                                                                                                              | IL-18<br>(IGIF)                  | Extracellular/Pro-inflammatory cytokine; involved in the neuroinflammatory response after intracerebral hemorrhage (Qian 17)                                                                                                                         | ↓   |
| Macrophage inflammatory protein-2 (Chemokine [C-X-C motif] ligand 2)                                                                                           | MIP-2<br>(CXCL2)                 | Extracellular/Chemokine secreted by monocytes and macrophages; chemotactic for polymorphonuclear leukocytes and hematopoietic stem cells (Chen 14)                                                                                                   | ↓   |
| Macrophage migration inhibitory factor                                                                                                                         | MIF                              | Released into plasma by white blood cells/ Cytokine triggering immune response to bacteria or injury (Wu 18)                                                                                                                                         | ↓   |
| Monocyte chemotactic protein 1 (CC chemokine ligand 2 )                                                                                                        | MCP1<br>(CCL2)                   | Extracellular/Chemokine secreted by inflammatory cells. Binds to epithelia, attracting and fixating mainly monocytes (Dharmodharan, Chen 14)                                                                                                         | ↑ ↓ |
| M1-macrophages                                                                                                                                                 | M1                               | Blood-stream and extracellular/pro-inflammatory, bactericidal, phagocytic (Wang 19)                                                                                                                                                                  | ↓   |
| NACHT domain leucine-rich-repeat and pyrin domain containing protein 3 (NLR family pyrin domain containing 3; Cryopyrin; Neuronal apoptosis inhibitor protein) | NALP3<br>(NACHT; NAIP; LRR; PYD) | Cytosol, inflammasomes/Pattern recognition receptor of the innate immune system. Expressed in macrophages (part of inflammasome). Activated NLRP3 triggers an immune response. (Liang 15, Qian 17)                                                   | ↓   |
| Nitrotyrosine                                                                                                                                                  | 3-Nitrotyrosine                  | Extracellular (various body fluids)/indicator of inflammation and stress; produced in presence of reactive nitrogen species (Oliveira)                                                                                                               | ↓   |
| Inducible nitric oxide synthase (Nitric oxide synthase 2)                                                                                                      | i-NOS<br>(NOS-2; HEP-NOS)        | Cytosol/Synthesizes Nitric Oxide (NO), a free radical acting also as neurotransmitter; NO may exhibit neurotoxic potential (Zhou 2019, Gajendrareddy, Ding 2018, Huang 2005)                                                                         | ↓   |
| Neuronal nitric oxide synthase                                                                                                                                 | n-NOS                            | Cytosol/Synthesizes Nitric Oxide (NO), a free radical (Ding)                                                                                                                                                                                         | ↓   |
| Nuclear factor kappa-B                                                                                                                                         | NF-kappaB                        | Cytosol/ Controls DNA transcription, cytokine production, immune response and cell survival (mitochondrial oxphos genes); pro-inflammatory; activated rapidly (Zhou 2019, Zhang 2013, Bai, Chen 2017, Kang 2014,2015, Sun 2019, Tan 2014, Yang 2013) | ↓   |

|                                                                                       |                       |                                                                                                                                                                                                                                                                                                         |    |
|---------------------------------------------------------------------------------------|-----------------------|---------------------------------------------------------------------------------------------------------------------------------------------------------------------------------------------------------------------------------------------------------------------------------------------------------|----|
| Toll-like-receptor 2                                                                  | TLR2                  | Cell membrane/in leucocytes, dendritic cells, mast-cells, microglia, Schwann-cells a.o. Part of the innate immune system. Recognizes patterns of pathogens (Tan)                                                                                                                                        | ↓  |
| Toll-like receptor 4<br>(cluster of differentiation 284)                              | TLR4<br>(CD284)       | Cell membrane/in leucocytes, mast-cells, dendritic cells a.o. Recognizes patterns of pathogens and mediates pro-inflammatory cytokine signaling (Wu 18, Kang 15, Liu 16)                                                                                                                                | ↓  |
| Tumor necrosis factor alpha<br>(Tumor necrosis factor ligand<br>superfamily member 2) | TNF-Alpha<br>(TNFSF2) | Extracellular/Downstream agent of Toll-like receptor 4. Secreted predominantly by macrophages. Complex function. Pro-inflammatory cytokine involved in apoptosis but also proliferation; induces fever (Zhang 2013, Wee 15, Poyrazoglu, Yang 01, Ding, Wu 18, Zhao 17, Tan 14, Wang 19, Lim 17, Liu 16) | ↓  |
| Transforming growth factor $\beta$                                                    | TGF-beta              | Extracellular; Downregulates immunologic processes; necessary for wound healing (Spiegelberg, Wee)                                                                                                                                                                                                      | ↑↓ |

Table S2. Molecular mechanisms of HBO according to indications

| Substance<br>(Synonym)                                               | Acronym<br>(Synonym)  | Effect<br>of<br>HBO | Publication                                                                                                                               | Setting<br>(Species) | Author<br>year                 |
|----------------------------------------------------------------------|-----------------------|---------------------|-------------------------------------------------------------------------------------------------------------------------------------------|----------------------|--------------------------------|
| <b>Wound healing, chronic wounds</b>                                 |                       |                     |                                                                                                                                           |                      |                                |
| Alpha-4 integrin                                                     | IA4 (CD49D;<br>ITGA4) | ↔                   | Integrin-mediated adhesive properties of neutrophils are reduced in hyperbaric oxygen therapy in patients with chronic non-healing wound. | Clinical             | Baiula<br>2020 [6]             |
| Beta-2 integrin                                                      | CD18                  | ↓                   |                                                                                                                                           |                      |                                |
| Alpha-4beta-1 integrin (very late activation antigen 4)              | VLA-4<br>(CD49DCD29)  | ↓                   |                                                                                                                                           |                      |                                |
| Matrix Metalloproteinase-9 (92 kDa gelatinase; <u>gelatinase B</u> ) | MMP-9 (GELB)          | ↓                   | Hyperbaric oxygen therapy accelerates wound healing in diabetic mice by decreasing active matrix metalloproteinase-9                      | Exp<br>(Mice)        | Nguyen<br>2020<br>[67]         |
| Reactive oxygen species                                              | ROS                   | ↓                   |                                                                                                                                           |                      |                                |
| Superoxide dismutase                                                 | SOD                   | ↑                   |                                                                                                                                           |                      |                                |
| Catalase                                                             | CAT                   | ↑                   |                                                                                                                                           |                      |                                |
| Glutathion Peroxidases                                               | GSH-Px                | ↑                   |                                                                                                                                           |                      |                                |
| Nuclear factor erythroid 2-related factor 2                          | Nrf2                  | ↑                   | Tissue-specific role of Nrf2 in the treatment of diabetic foot ulcers during hyperbaric oxygen therapy.                                   | Clinical             | Dhamod<br>haran<br>2019<br>[5] |
| Epidermal growth factor                                              | EGF                   | ↑                   |                                                                                                                                           |                      |                                |
| Vascular endothelial growth factor                                   | VEGF                  | ↑                   |                                                                                                                                           |                      |                                |
| Platelet derived growth factor                                       | PDGF                  | ↑                   |                                                                                                                                           |                      |                                |
| Fibroblast growth factor 2 (basic fibroblast growth factor 2)        | FGF-2                 | ↑                   |                                                                                                                                           |                      |                                |
| CxCl motif chemokine 10<br>(interferon gamma induced protein)        | CXCL10                | ↑                   |                                                                                                                                           |                      |                                |
| CxCl motif chemokine ligand 8<br>(Interleukin 8)                     | CXCL8<br>(IL-8)       | ↑                   |                                                                                                                                           |                      |                                |
| Monocyte chemotactic protein 1 (CC chemokine ligand 2 )              | MCP1<br>(CCL2)        | ↑                   |                                                                                                                                           |                      |                                |

|                                                                                                              |                       |   |                                                                                                                                          |                                                       |                            |
|--------------------------------------------------------------------------------------------------------------|-----------------------|---|------------------------------------------------------------------------------------------------------------------------------------------|-------------------------------------------------------|----------------------------|
| Metastasis associated lung adenocarcinoma transcript 1<br>(noncoding nuclear-enriched abundant transcript 2) | MALAT 1<br>(NEAT 2)   | ↑ | Hyperbaric oxygen boosts long noncoding RNA MALAT1 exosome secretion to suppress microRNA-92 expression in therapeutic angiogenesis.     | Exp<br>(human coronary artery cell exo-somes in rats) | Shyu<br>2019<br>[8]        |
| Krüppel-like factor 2                                                                                        | KLF-2                 | ↑ |                                                                                                                                          |                                                       |                            |
| Micro-RNA 92a                                                                                                | miR-92a               | ↓ |                                                                                                                                          |                                                       |                            |
| Malondialdehyde (Propandial)                                                                                 | MDA                   | ↓ | Effects of Hyperbaric Oxygen and Preconditioning on Wound Healing in Colonic Anastomoses.                                                | Exp<br>(Rats)                                         | Poyrazoglu<br>2015<br>[44] |
| Myeloperoxidase                                                                                              | MPO                   | ↓ |                                                                                                                                          |                                                       |                            |
| Superoxide dismutase                                                                                         | SOD                   | ↑ |                                                                                                                                          |                                                       |                            |
| Glutathione peroxidase                                                                                       | GSH-Px                | ↑ |                                                                                                                                          |                                                       |                            |
| Tumor necrosis factor alpha (Tumor necrosis factor ligand superfamily member 2)                              | TNF-Alpha<br>(TNFSF2) | ↓ |                                                                                                                                          |                                                       |                            |
| Interleukin-6 (Interferon beta 2)                                                                            | IL-6 (IFNB2)          | ↓ |                                                                                                                                          |                                                       |                            |
| Interleukin- 10 (Cytokine-synthesis inhibitory factor)                                                       | IL-10 (CSIF)          | ↓ |                                                                                                                                          |                                                       |                            |
| Hypoxia inducible factor 1 alpha subunit                                                                     | HIF-1alpha<br>(HIF1A) | ↑ | Hyperbaric oxygen therapy activates hypoxia-inducible factor 1 (HIF-1), which contributes to improved wound healing in diabetic mice     | Exp<br>(Mice)                                         | Sunkari<br>2015<br>[18]    |
| Intracellular adhesion molecule- 1                                                                           | ICAM-1 (CD54)         | ↓ | Hyperbaric oxygen treatment reduces neutrophil-endothelial adhesion in chronic wound conditions through S-nitrosation                    | Exp<br>(human umbilical vein)                         | Kendall<br>2013<br>[9]     |
| Vascular cell adhesion molecule-1                                                                            | VCAM-1 (CD106)        | ↓ |                                                                                                                                          |                                                       |                            |
| Angiogenin (Ribonuclease 5)                                                                                  | ANG (RNASE5)          | ↑ | Changes in inflammatory gene expression induced by hyperbaric oxygen treatment in human endothelial cells under chronic wound conditions | Exp<br>(human endothelial cells)                      | Kendall<br>2012 [9]        |
| Interleukin-8 (CXC motif-chemokine-8)                                                                        | CXCL8                 | ↓ |                                                                                                                                          |                                                       |                            |
| Endothelial nitric oxide gene expression                                                                     | eNOS                  | ↑ |                                                                                                                                          |                                                       |                            |
| Nuclear factor erythroid 2-related factor 2                                                                  | Nrf2                  | ↑ | Hyperbaric oxygen induces a cytoprotective and angiogenic response in human microvascular endothelial cells.                             | Exp                                                   | Godman<br>2010             |
| Heme oxygenase 1                                                                                             | HO-1 (HMOX1)          | ↑ |                                                                                                                                          |                                                       |                            |

|                                                               |                                                |   |                                                                                                                                                                                              |                                    |                           |
|---------------------------------------------------------------|------------------------------------------------|---|----------------------------------------------------------------------------------------------------------------------------------------------------------------------------------------------|------------------------------------|---------------------------|
| Heat shock 70 kDa protein 1 (Heat shock protein 72)           | HSPA 1A (HSP72)                                | ↑ |                                                                                                                                                                                              | (human vascular endothelial cells) | [11]                      |
| N1-methyladenosine                                            | M1A                                            | ↑ |                                                                                                                                                                                              |                                    |                           |
| Actin alpha cardiac muscle                                    | ACTC1 (ACTC)                                   | ↑ |                                                                                                                                                                                              |                                    |                           |
| FOS protein                                                   | FOS (AP-1; c-fos)                              | ↑ |                                                                                                                                                                                              |                                    |                           |
| Protein fosB                                                  | FOSB (G0/G1 switch regulatory protein 3; GOS3) | ↑ |                                                                                                                                                                                              |                                    |                           |
| Transcription factor JUNB                                     | JUNB                                           | ↑ |                                                                                                                                                                                              |                                    |                           |
| Hypoxia- inducible factor 1-alpha                             | HIF-1alpha (HIF1A)                             | ↓ | Hyperbaric oxygen attenuates apoptosis and decreases inflammation in an ischemic wound model                                                                                                 | Exp (Rats)                         | Zhang 2008 [46]           |
| Anti-apoptotic B-cell lymphoma 2                              | Bcl-2                                          | ↑ |                                                                                                                                                                                              |                                    |                           |
| Cleaved caspase 3                                             | CASP-3                                         | ↓ |                                                                                                                                                                                              |                                    |                           |
| p53                                                           | p53                                            | ↓ |                                                                                                                                                                                              |                                    |                           |
| Vascular endothelial growth factor                            | VEGF                                           | ↓ |                                                                                                                                                                                              |                                    |                           |
| Cyclooxygenase 2 (Prostaglandin synthase 2)                   | COX-2 (PGHS-2)                                 | ↓ |                                                                                                                                                                                              |                                    |                           |
| Inducible nitric oxide synthase (Nitric oxide synthase 2)     | i-NOS (NOS-2, HEP-NOS)                         | ↓ | Hyperbaric oxygen therapy ameliorates stress-impaired dermal wound healing.                                                                                                                  | Exp (Mice)                         | Gajend-rareddy 2005 [71]  |
| <b>Ischemia - Reperfusion</b>                                 |                                                |   |                                                                                                                                                                                              |                                    |                           |
| Heme oxygenase-1                                              | HO-1 (HMOX1)                                   | ↑ | Hyperbaric oxygen preconditioning upregulates Heme Oxygenase-1 and Anti-Apoptotic Bcl-2 protein expression in spontaneously hypertensive rats with induced postischemic acute kidney injury. | Exp (Rats)                         | Nesovic Ostojic 2021 [69] |
| Anti-apoptotic B cell lymphoma-2                              | Bcl-2                                          | ↑ |                                                                                                                                                                                              |                                    |                           |
| Mechanistic target of rapamycin                               | mTOR (FRAP-1)                                  | ↑ | Hyperbaric oxygen alleviated cognitive impairments in mice induced by repeated cerebral ischemia-reperfusion injury via inhibition of autophagy                                              | Exp (Rats)                         | Chen 2020 [77]            |
| Eukaryotic translation initiation factor 4E-binding protein 1 | 4E-BP1                                         | ↑ |                                                                                                                                                                                              |                                    |                           |

|                                                                    |                            |   |                                                                                                                                                              |            |           |
|--------------------------------------------------------------------|----------------------------|---|--------------------------------------------------------------------------------------------------------------------------------------------------------------|------------|-----------|
| Microtubule-associated proteins 1A/1B light chain 3B               | LC3II                      | ↓ |                                                                                                                                                              |            |           |
| Autophagy related 5 protein                                        | ATG5                       | ↓ |                                                                                                                                                              |            |           |
| P53                                                                | p53 (LFS1)                 | ↓ |                                                                                                                                                              |            |           |
| Brain derived neurotrophic factor (abrineurin)                     | BDNF (ANON2, BULN2)        | ↑ |                                                                                                                                                              |            |           |
| Protein kinase B (phophorylized Akt)                               | p-Akt                      | ↑ |                                                                                                                                                              |            |           |
| Intracellular adhesion molecule 1 (Cluster of Differentiation 54)  | ICAM-1 (CD54)              | ↓ | Effect of Hyperbaric Oxygen on Tissue Damage and Expression of Adhesion Molecules and C3 in a                                                                | Exp (Rats) | Zhao 2020 |
| Vascular cell adhesion molecule 1 (Cluster of differentiation 106) | VCAM-1 (CD106)             | ↓ | Rat Model of Renal Ischemia-Reperfusion Injury After Kidney Transplantation                                                                                  |            | [77]      |
| Complement component 3                                             | C3                         | ↓ |                                                                                                                                                              |            |           |
| Caveolin-1                                                         | CAV-1 (BSCL3, CGL3, LCCNS) | ↑ | Effect of hyperbaric oxygen on the permeability of the blood-brain barrier in rats with global cerebral ischemia/ reperfusion injury                         | Exp (Rats) | Li 2018   |
| Zonula occludens-1 (Tight junction protein-1)                      | ZO-1 (TJP-1)               | ↑ |                                                                                                                                                              |            | [31]      |
| Nuclear factor Kappa B                                             | NF-KappaB                  | ↓ | Hyperbaric oxygen protects against myocardial reperfusion injury via the inhibition of inflammation and the modulation of autophagy                          | Exp (Rats) | Chen 2017 |
| Microtubule-associated proteins 1A/1B light chain 3B               | LC3B                       | ↓ |                                                                                                                                                              |            | [55]      |
| Beclin-1 (Autophagy related gene 6)                                | BECN1 (ATG6)               | ↓ |                                                                                                                                                              |            |           |
| Mechanistic target of Rapamycin                                    | m-TOR (FRAP-1)             | ↑ |                                                                                                                                                              |            |           |
| Protein kinase B                                                   | Akt                        | ↑ |                                                                                                                                                              |            |           |
| Interleukin-6 (Interferon-beta 2)                                  | IL-6 (IFNB2)               | ↑ | Hyperbaric Oxygenation Protects Against Ischemia-Reperfusion Injury in Transplanted Rat Kidneys by Triggering Autophagy and Inhibiting Inflammatory Response | Exp (Rats) | Bao 2017  |
| Microtubule-associated protein 1A/1B-light chain 3                 | LC-3                       | ↑ |                                                                                                                                                              |            | [79]      |
| High mobility group protein 1                                      | HMGP1                      | ↓ | Preconditioned hyperbaric oxygenation protects skin flap grafts in rats against ischemia/reperfusion injury                                                  | Exp (Rats) | Kang 2014 |
| Nuclear factor kappa-B                                             | NF-kappaB                  | ↓ |                                                                                                                                                              |            | [50]      |
| Malondialdehyde (Propandial)                                       | MDA                        | ↓ |                                                                                                                                                              | Exp        | Zhang     |



|                                                                                                 |                              |   |                                                                                                                                                                                                  |            |                     |
|-------------------------------------------------------------------------------------------------|------------------------------|---|--------------------------------------------------------------------------------------------------------------------------------------------------------------------------------------------------|------------|---------------------|
| Superoxide dismutase                                                                            | SOD                          | ↑ | Hyperbaric oxygen therapy in rats attenuates ischemia-reperfusion testicular injury through blockade of oxidative stress, suppression of inflammation , and reduction of nitric oxide formation. | (Rats)     | 2013 [57]           |
| Heme oxygenase                                                                                  | HO-1 (HMOX1)                 | ↑ |                                                                                                                                                                                                  |            |                     |
| Nicotinamide adenine dinucleotide phosphate oxidase                                             | NADPH-oxidase                | ↓ |                                                                                                                                                                                                  |            |                     |
| Myeloperoxidase                                                                                 | MPO                          | ↓ |                                                                                                                                                                                                  |            |                     |
| Tumor necrosis factor alpha (Tumor necrosis factor ligand superfamily member 2)                 | TNF-Alpha (TNFSF2)           | ↓ |                                                                                                                                                                                                  |            |                     |
| Interleukin 1beta (leucocytic pyrogen; lymphocyte activating factor)                            | IL-1beta (IL-1; IL1B; IL1F2) | ↓ |                                                                                                                                                                                                  |            |                     |
| Cluster of differentiation 44                                                                   | CD 44                        | ↓ |                                                                                                                                                                                                  |            |                     |
| Nuclear factor KappaB                                                                           | NF KappaB                    | ↓ |                                                                                                                                                                                                  |            |                     |
| C-Jun-N terminal kinases (mitogen activated protein-kinase-8; stress activated phospho-kinases) | JNK (MAPK8; SAPK; PRKM8)     | ↓ |                                                                                                                                                                                                  |            |                     |
| Nitric oxide (endothelium derived relaxing factor)                                              | NO (EDRF)                    | ↓ | Effects of hyperbaric oxygen on the expression of claudins after cerebral ischemia-reperfusion in rats.                                                                                          | Exp (Rats) | Zhao 2011 [72]      |
| Matrix-Metalloproteinase 9 (92 kDa gelatinase; <u>gelatinase B</u> )                            | MMP-9 (GELB)                 | ↓ |                                                                                                                                                                                                  |            |                     |
| Matrix Metalloproteinase-2 (72 kDa type IV collagenase; gelatinase A)                           | MMP-2 (CLG4A)                | ↓ |                                                                                                                                                                                                  |            |                     |
| Claudin-1                                                                                       | CLDN1                        | ↑ |                                                                                                                                                                                                  |            |                     |
| Claudin-5                                                                                       | CLDN5                        | ↑ |                                                                                                                                                                                                  |            |                     |
| Matrix-Metalloproteinase 9 (92 kDa gelatinase; <u>gelatinase B</u> )                            | MMP-9 (GELB)                 | ↓ | Hyperbaric oxygen reduces basal lamina degradation after transient focal cerebral ischemia in rats                                                                                               | Exp (Rats) | Velt-kamp 2006 [73] |
| Tumor necrosis factor alpha (Tumor necrosis factor ligand superfamily member 2)                 | TNF-Alpha (TNFSF2)           | ↓ |                                                                                                                                                                                                  |            |                     |
|                                                                                                 |                              |   | Hyperbaric O2 reduces intestinal ischemia-reperfusion-induced TNF-alpha production and lung neutrophil sequestration                                                                             | Exp (Rats) | Yang 2001 [59]      |
| <b>Neuronal injury, neuropathic pain</b>                                                        |                              |   |                                                                                                                                                                                                  |            |                     |

|                                                                                 |                              |   |                                                                                                                                                                                     |            |                 |
|---------------------------------------------------------------------------------|------------------------------|---|-------------------------------------------------------------------------------------------------------------------------------------------------------------------------------------|------------|-----------------|
| Superoxide dismutase                                                            | SOD                          | ↑ | Neuroprotective effects of hyperbaric oxygen (HBO) therapy on neuronal death induced by sciatic nerve transection in rat                                                            | Exp (Rats) | Shams 2017 [30] |
| Catalase                                                                        | CAT                          | ↑ |                                                                                                                                                                                     |            |                 |
| Caspase-3 (Cystein aspartic acid protease)                                      | CASP-3                       | ↓ |                                                                                                                                                                                     |            |                 |
| Cyclooxygenase 2 (Prostaglandin synthase 2)                                     | COX-2 (PGHS-2)               | ↓ |                                                                                                                                                                                     |            |                 |
| S-100 proteins                                                                  | S-100                        | ↑ |                                                                                                                                                                                     |            |                 |
| Mechanistic target of rapamycin                                                 | m-Tor                        | ↓ | Hyperbaric oxygen treatment attenuates neuropathic pain by elevating autophagy flux via inhibiting mTOR pathway.                                                                    | Exp (Rats) | Liu 2017        |
| Tumor necrosis factor alpha (Tumor necrosis factor ligand superfamily member 2) | TNF-Alpha (TNFSF2)           | ↓ | The analgesic effect of early hyperbaric oxygen treatment in chronic constriction injury in rats and its influence on nNOS and i-NOS expression and inflammatory factor production. | Exp (Rats) | Ding 2018 [60]  |
| Interleukin 1beta (leucocytic pyrogen; lymphocyte activating factor)            | IL-1beta (IL-1; IL1B; IL1F2) | ↓ |                                                                                                                                                                                     |            |                 |
| Inducible nitric oxide synthase (Nitric oxide synthase 2)                       | i-NOS (NOS-2; HEP-NOS)       | ↓ |                                                                                                                                                                                     |            |                 |
| Neuronal nitric oxide synthase                                                  | n-NOS                        | ↓ |                                                                                                                                                                                     |            |                 |
| Tumor necrosis factor alpha (Tumor necrosis factor ligand superfamily member 2) | TNF-Alpha (TNFSF2)           | ↓ |                                                                                                                                                                                     |            |                 |
| Interleukin 1beta (leucocytic pyrogen; lymphocyte activating factor)            | IL-1beta (IL-1; IL1B; IL1F2) | ↓ | Early Hyperbaric Oxygen Treatment Attenuates Burn-Induced Neuroinflammation by Inhibiting the Galectin-3-Dependent Toll-Like Receptor-4 Pathway in a Rat Model                      | Exp (Rats) | Wu 2018 [49]    |
| Galectin-3 (Lectin galactoside binding soluble 3)                               | GAL-3 (LGALS-3)              | ↓ |                                                                                                                                                                                     |            |                 |
| Toll-like receptor 4 (cluster of differentiation 284)                           | TLR4 (CD284)                 | ↓ |                                                                                                                                                                                     |            |                 |
| Macrophage migration inhibitory factor                                          | MIF                          | ↓ |                                                                                                                                                                                     |            |                 |
| Cytochrome C                                                                    | CYC                          | ↓ |                                                                                                                                                                                     |            |                 |
| Cleaved Caspase-3                                                               | Cleaved ASP 175              | ↓ | Early Hyperbaric Oxygen Treatment Attenuates Burn-Induced Neuroinflammation by Inhibiting the Galectin-3-Dependent Toll-Like Receptor-4 Pathway in a Rat Model                      | Exp (Rats) | Fu 2017 [76]    |
| Tumor necrosis factor alpha (Tumor necrosis factor ligand superfamily member 2) | TNF-Alpha (TNFSF2)           | ↓ | Hyperbaric oxygen attenuates neuropathic pain and reverses inflammatory signaling likely via the Kindlin-1/Wnt-10a signaling pathway in the chronic pain injury model in rats       | Exp (Rats) | Zhao 2017 [61]  |
| Kindlin-1                                                                       | Kindlin-1                    | ↓ |                                                                                                                                                                                     |            |                 |
| Wnt family member 10a                                                           | Wnt-10a (OODD)               | ↓ |                                                                                                                                                                                     |            |                 |

|                                                           |                        |   |                                                                                                                                                                 |            |                    |
|-----------------------------------------------------------|------------------------|---|-----------------------------------------------------------------------------------------------------------------------------------------------------------------|------------|--------------------|
| Nitric oxide (endothelium derived relaxing factor)        | NO (EDRF)              | ↑ | A prolonged nitric oxide dependent, opioid-mediated antinociceptive effect of hyperbaric oxygen in mice                                                         | Exp (Mice) | Zelinski 2008 [75] |
| <b>Spinal cord injury</b>                                 |                        |   |                                                                                                                                                                 |            |                    |
| Mechanistic target of rapamycin                           | p-m-TOR                | ↓ | HBO-PC Promotes Locomotor Recovery by Reducing Apoptosis and Inflammation in SCI Rats: The Role of the mTOR Signaling Pathway.                                  | Exp (Rats) | Chen 2020 [42]     |
| High mobility group protein 1                             | HMGP1                  | ↓ | Effect of hyperbaric oxygen therapy on HMGB1/NF-kappaB expression and prognosis of acute spinal cord injury: A randomized clinical trial.                       | Clinical   | Sun 2019 [4]       |
| Nuclear factor kappa-B                                    | NF-kappaB              | ↓ |                                                                                                                                                                 |            |                    |
| Inducible nitric oxide synthase (Nitric oxide synthase 2) | i-NOS (NOS-2, HEP-NOS) | ↓ | Hyperbaric Oxygen improves functional recovery of the injured spinal cord by inhibiting inflammation and glial scar formation                                   | Exp (Rats) | Zhou 2019 [39]     |
| Cyclooxygenase 2 (Prostaglandin synthase 2)               | COX-2 (PGHS-2)         | ↓ |                                                                                                                                                                 |            |                    |
| Gilal fibrillary acidic protein                           | GFAP                   | ↓ |                                                                                                                                                                 |            |                    |
| Nuclear factor kappa-B                                    | NF-KappaB              | ↓ |                                                                                                                                                                 |            |                    |
| Protein kinase B                                          | Akt                    | ↓ | Analysis of the effect of hyperbaric oxygen preconditioning on neuronal apoptosis, Ca2+ concentration and caspases expression after spinal cord injury in rats. | Exp (Rats) | Pan 2018 [41]      |
| Cysteine-aspartic acid proteases 3/7/8/12                 | Caspases 3/7/8/12      | ↓ |                                                                                                                                                                 |            |                    |
| Superoxide dismutase                                      | SOD                    | ↑ | Hyperbaric oxygen treatment of spinal cord injury in rat model.                                                                                                 | Exp (Rats) | Sun 2017 [62]      |
| Malondialdehyde (Propandial)                              | MDA                    | ↓ |                                                                                                                                                                 |            |                    |
| Beclin-1 (Autophagy related gene 6)                       | BECN1 (ATG6)           | ↑ | Changes in autophagy in rats after spinal cord injury and the effect of hyperbaric oxygen on autophagy                                                          | Exp (Rats) | Sun 2016 [78]      |
| Microtubule-associated protein 1A/1B-light chain 3        | LC3II (MAP1LC3B)       | ↑ |                                                                                                                                                                 |            |                    |
| Receptor for advanced glycation end products              | RAGE                   | ↓ | Effects of hyperbaric oxygen therapy on RAGE and MCP-1 expression in rats with spinal cord injury                                                               | Exp (Rats) | Wang 2016 [74]     |
| Monocyte chemotactic protein 1 (CC chemokine ligand 2 )   | MCP-1 (CCL2)           | ↓ |                                                                                                                                                                 |            |                    |

|                                                                                                               |                       |   |                                                                                                                                                                              |                   |                 |
|---------------------------------------------------------------------------------------------------------------|-----------------------|---|------------------------------------------------------------------------------------------------------------------------------------------------------------------------------|-------------------|-----------------|
| Myeloperoxidase                                                                                               | MPO                   | ↓ | Hyperbaric oxygen intervention reduces secondary spinal cord injury in rats via regulation of HMGB1/TLR4/NF-kappaB signaling pathway                                         | Exp (Rats)        | Kang 2015 [51]  |
| High mobility group protein 1                                                                                 | HMGP1                 | ↓ |                                                                                                                                                                              |                   |                 |
| Nuclear factor kappa-B                                                                                        | NF-KappaB             | ↓ |                                                                                                                                                                              |                   |                 |
| Toll-like receptor 4 (cluster of differentiation 284)                                                         | TLR4 (CD284)          | ↓ |                                                                                                                                                                              |                   |                 |
| Reactive oxygen species                                                                                       | ROS                   | ↑ |                                                                                                                                                                              |                   |                 |
| Nitric oxide (endothelium derived relaxing factor)                                                            | NO (EDRF)             | ↑ |                                                                                                                                                                              |                   |                 |
| Mitogen activated protein kinase kinase                                                                       | MEK1/2 (MAPK2; MAPKK) | ↑ | Signaling pathways involved in HSP32 induction by hyperbaric oxygen in rat spinal neurons                                                                                    | Exp (Rat neurons) | Huang 2016 [15] |
| Extracellular signal related kinase                                                                           | ERK1/2                | ↑ |                                                                                                                                                                              |                   |                 |
| cAMP response element-binding protein                                                                         | CREB                  | ↑ |                                                                                                                                                                              |                   |                 |
| Bach-1                                                                                                        | Bach1                 | ↑ |                                                                                                                                                                              |                   |                 |
| Nuclear factor erythroid 2-related factor 2                                                                   | Nrf2                  | ↑ |                                                                                                                                                                              |                   |                 |
| NACHT domain leucine-rich-repeat and pyrin domain containing protein 3 (NLR family pyrin domain containing 3) | NALP3 (NLRP3)         | ↓ |                                                                                                                                                                              |                   |                 |
| Apoptosis-associated speck-like protein containing a CARD (caspase activation and recruitment domain) domain  | ASC (PYCARD)          | ↓ | Effects of hyperbaric oxygen therapy on NACHT domain-leucine-rich-repeat- and pyrin domain-containing protein 3 inflammasome expression in rats following spinal cord injury | Exp (Rats)        | Liang 2015 [81] |
| Caspase-1 (Interleukin converting enzyme)                                                                     | ICE                   | ↓ |                                                                                                                                                                              |                   |                 |
| Interleukin 1-Beta                                                                                            | IL-1B (IL-1Beta)      | ↓ |                                                                                                                                                                              |                   |                 |
| Heme Oxygenase                                                                                                | HO-1 (HMOX1)          | ↑ |                                                                                                                                                                              |                   |                 |
| Heat shock protein 27 (heat shock protein beta-1)                                                             | HSP27 (HSPB1)         | ↑ |                                                                                                                                                                              |                   |                 |
| Heat shock protein 70                                                                                         | HSP70                 | ↑ |                                                                                                                                                                              |                   |                 |
| Heat shock protein 90                                                                                         | HSP90                 | ↑ | Hyperbaric oxygen preconditioning induces tolerance against oxidative injury and oxygen-glucose deprivation by up-regulating heat shock protein 32 in rat spinal neurons     | Exp (Rat-neurons) | Huang 2014 [55] |
| Nuclear factor kappa-B                                                                                        | NF-kappaB             | ↓ |                                                                                                                                                                              |                   |                 |
| Toll-like-Rezeptor 2                                                                                          | TLR2                  | ↓ |                                                                                                                                                                              |                   |                 |
| Interleukin 1 beta                                                                                            | IL-1 Beta (IL-1B)     | ↓ |                                                                                                                                                                              |                   |                 |
| Tumor necrosis factor alpha (Tumor necrosis factor ligand superfamily member 2)                               | TNF-Alpha (TNFSF2)    | ↓ |                                                                                                                                                                              |                   |                 |
|                                                                                                               |                       |   |                                                                                                                                                                              |                   |                 |
|                                                                                                               |                       |   | Protective effects of hyperbaric oxygen treatment against spinal cord injury in rats via toll-like receptor 2/nuclear factor-kappaB signaling                                | Exp (Rats)        | Tan 2014 [33]   |
|                                                                                                               |                       |   |                                                                                                                                                                              |                   |                 |
|                                                                                                               |                       |   |                                                                                                                                                                              |                   |                 |
|                                                                                                               |                       |   |                                                                                                                                                                              |                   |                 |
|                                                                                                               |                       |   |                                                                                                                                                                              |                   |                 |
|                                                                                                               |                       |   |                                                                                                                                                                              |                   |                 |

|                                                                                 |                                 |     |                                                                                                                                                      |               |                      |
|---------------------------------------------------------------------------------|---------------------------------|-----|------------------------------------------------------------------------------------------------------------------------------------------------------|---------------|----------------------|
| Vascular endothelial growth factor                                              | VEGF                            | ↑   | Effect of VEGF and CX43 on the promotion of neurological recovery by hyperbaric oxygen treatment in spinal cord-injured rats.                        | Exp<br>(Rats) | Liu<br>2014<br>[38]  |
| Connexin                                                                        | CX                              | ↓ ↑ |                                                                                                                                                      |               |                      |
| High mobility group protein B 1                                                 | HMGB1                           | ↓   | Hyperbaric oxygen alleviates experimental (spinal cord) injury by downregulating HMGB1/NF-kappaB expression                                          | Exp<br>(Rats) | Yang<br>2013<br>[48] |
| Nuclear factor kappa-B                                                          | NF-kappaB                       | ↓   |                                                                                                                                                      |               |                      |
| <b>Brain injury</b>                                                             |                                 |     |                                                                                                                                                      |               |                      |
| Dynamin related protein 1 (Dynamin like protein 1)                              | Drp 1<br>(DLP1; DNM1L)          | ↓   | Protective Effects of Hyperbaric Oxygen Therapy on Brain Injury by Regulating the Phosphorylation of Drp1 Through ROS/PKC Pathway in Heatstroke Rats | Exp<br>(Rats) | Ni<br>2020<br>[52]   |
| Malondialdehyde (Propandial)                                                    | MDA                             | ↓   |                                                                                                                                                      |               |                      |
| 8-Hydroxyguanine                                                                | 8-oxo-Gua                       | ↓   |                                                                                                                                                      |               |                      |
| Superoxide dismutase                                                            | SOD                             | ↑   |                                                                                                                                                      |               |                      |
| Glutathione (reduced)                                                           | Glutathione                     | ↑   |                                                                                                                                                      |               |                      |
| Caspase 3 (Cystein aspartic acid protease)                                      | CASP3                           | ↓   | Hyperbaric oxygen therapy attenuates neuronal apoptosis induced by traumatic brain injury via Akt/GSK3beta/beta-catenin pathway                      | Exp<br>(Mice) | He<br>2019<br>[35]   |
| Caspase 6 (Cystein aspartic acid protease)                                      | CASP6                           | ↓   |                                                                                                                                                      |               |                      |
| Reactive oxygen species                                                         | ROS                             | ↓   |                                                                                                                                                      |               |                      |
| Protein kinase B                                                                | Akt                             | ↑   |                                                                                                                                                      |               |                      |
| Glycogen synthase kinase-3                                                      | GSK3beta                        | ↑   |                                                                                                                                                      |               |                      |
| Beta catenin-1                                                                  | CTNNB1                          | ↑   |                                                                                                                                                      |               |                      |
| Matrix-Metalloproteinase 9 (92 kDa gelatinase; gelatinase B)                    | MMP-9 (GELB)                    | ↓   |                                                                                                                                                      |               |                      |
| M1-macrophages                                                                  | M1                              | ↓   |                                                                                                                                                      |               |                      |
| Tumor necrosis factor alpha (Tumor necrosis factor ligand superfamily member 2) | TNF-Alpha<br>(TNFSF2)           | ↓   |                                                                                                                                                      |               |                      |
| Interleukin 1beta (leucocytic pyrogen; lymphocyte activating factor)            | IL-1beta (IL-1;<br>IL1B; IL1F2) | ↓   |                                                                                                                                                      |               |                      |
|                                                                                 |                                 |     | Hyperbaric oxygen preconditioning attenuates brain injury after intracerebral hemorrhage by regulating microglia polarization in rats.               | Exp<br>(Rats) | Wang<br>2019<br>[58] |

|                                                                                                 |                                |   |                                                                                                                                                                                         |               |                           |
|-------------------------------------------------------------------------------------------------|--------------------------------|---|-----------------------------------------------------------------------------------------------------------------------------------------------------------------------------------------|---------------|---------------------------|
| C-Jun-N terminal kinases (mitogen activated protein-kinase-8; stress activated phospho-kinases) | JNK<br>(MAPK8; SAPK; PRKM8)    | ↓ |                                                                                                                                                                                         |               |                           |
| Signal transducer and activator of transcription 1                                              | STAT-1                         | ↓ |                                                                                                                                                                                         |               |                           |
| Sirtuin 1                                                                                       | SIRT 1                         | ↑ | Sirt1 mediates improvement of isoflurane-induced memory impairment following hyperbaric preconditioning in middle-aged mice                                                             | Exp<br>(Mice) | Hong-Qian<br>2018<br>[56] |
| Nuclear factor erythroid 2-related factor 2                                                     | NRF2                           | ↑ |                                                                                                                                                                                         |               |                           |
| Heme oxygenase 1                                                                                | HO-1 (HMOX1)                   | ↑ |                                                                                                                                                                                         |               |                           |
| Integrin AlphaM/CD11b                                                                           | ITGAM                          | ↑ | Hyperbaric Oxygen Effects on Depression-Like Behavior and Neuroinflammation in Traumatic Brain Injury Rats.                                                                             | Exp<br>(Rats) | Lim<br>2017<br>[62]       |
| Tumor necrosis factor alpha (Tumor necrosis factor ligand superfamily member 2)                 | TNF-Alpha<br>(TNFSF2)          | ↓ |                                                                                                                                                                                         |               |                           |
| aCryopyrin (Neuronal apoptosis inhibitor protein)                                               | NLRP-3 (NACHT; NAIP; LRR; PYD) | ↓ | Hyperbaric oxygen alleviates the activation of NLRP-3-inflammasomes in traumatic brain injury                                                                                           | Exp<br>(Rats) | Qian<br>2017<br>[83]      |
| Interleukin 1beta (leucocytic pyrogen; lymphocyte activating factor)                            | IL-1beta (IL-1; IL1B; IL1F2)   | ↓ |                                                                                                                                                                                         |               |                           |
| Interleukin 18 (Interferon gamma inducing factor)                                               | IL-18 (IGIF)                   | ↓ |                                                                                                                                                                                         |               |                           |
| Vascular endothelial growth factor                                                              | VEGF                           | ↑ | Hyperbaric oxygen promotes neural stem cell proliferation by activating vascular endothelial growth factor/extracellular signal-regulated kinase signaling after traumatic brain injury | Exp<br>(Rats) | Yang<br>2017<br>[64]      |
| Vascular endothelial growth factor receptor 2                                                   | VEGFR2                         | ↑ |                                                                                                                                                                                         |               |                           |
| Rapidly accelerated fibrosarcoma                                                                | Raf-1 (C-Raf)                  | ↑ |                                                                                                                                                                                         |               |                           |
| Mitogen activated protein kinase kinase                                                         | MEK 1/2 (MAPK2; MAPKK)         | ↑ |                                                                                                                                                                                         |               |                           |
| Extracellular signal-regulated protein kinase                                                   | ERK                            | ↑ |                                                                                                                                                                                         |               |                           |
| Toll-like receptor 4 (cluster of differentiation 284)                                           | TLR4 (CD284)                   | ↓ | Hyperbaric Oxygen Intervention Modulates Early Brain Injury after Experimental Subarachnoid Hemorrhage in Rats: Possible Involvement of TLR4/NF-x03BA; B-Mediated Signaling Pathway     | Exp<br>(Rats) | Liu<br>2016<br>[63]       |
| Epithelial LPS-mediated nuclear factor x03BA;B                                                  | NF-x03BA;B                     | ↓ |                                                                                                                                                                                         |               |                           |
| Tumor necrosis factor alpha (Tumor necrosis factor ligand superfamily member 2)                 | TNF-Alpha<br>(TNFSF2)          | ↓ |                                                                                                                                                                                         |               |                           |
| Interleukin-6 (Interferon beta 2)                                                               | IL-6 (IFNB2)                   | ↓ |                                                                                                                                                                                         |               |                           |
| Interleukin -1 Beta                                                                             | IL-1Beta                       | ↓ |                                                                                                                                                                                         |               |                           |

|                                                                                 |                    |   |                                                                                                                                                                   |            |                   |
|---------------------------------------------------------------------------------|--------------------|---|-------------------------------------------------------------------------------------------------------------------------------------------------------------------|------------|-------------------|
| Intracellular adhesion molecule 1 (Cluster of Differentiation 54)               | ICAM-1 (CD54)      | ↓ | Hyperbaric oxygen effects on neuronal apoptosis associations in a traumatic brain injury rat model.                                                               | Exp (Rats) | Wee 2015 [45]     |
| Tumor necrosis factor alpha (Tumor necrosis factor ligand superfamily member 2) | TNF-Alpha (TNFSF2) | ↓ |                                                                                                                                                                   |            |                   |
| TGFB-induced factor                                                             | TGIF               | ↓ |                                                                                                                                                                   |            |                   |
| Transforming growth factor beta                                                 | TGF-beta           | ↑ | Repetitive hyperbaric oxygenation attenuates reactive astrogliosis and suppresses expression of inflammatory mediators in the rat model of brain injury           | Exp (Rats) | Lavrnja 2015 [34] |
| Glial fibrillary acidic protein                                                 | GFAP               | ↓ |                                                                                                                                                                   |            |                   |
| Intracellular adhesion molecule 1 (Cluster of Differentiation 54)               | ICAM-1 (CD54)      | ↓ |                                                                                                                                                                   |            |                   |
| Vimentin                                                                        | VIM                | ↓ | Interleukin-10 mediates the neuroprotection of hyperbaric oxygen therapy against traumatic brain injury in mice                                                   | Exp (Mice) | Chen 2014 [37]    |
| Cluster of differentiation 40                                                   | CD40               | ↓ |                                                                                                                                                                   |            |                   |
| Interleukin- 10 (Cytokine-synthesis inhibitory factor)                          | IL-10 (CSIF)       | ↑ |                                                                                                                                                                   |            |                   |
| Cleaved caspase 3/pro cleaved caspase 3                                         | C3/pro-C3          | ↓ |                                                                                                                                                                   |            |                   |
| Bcl-2-associated X protein                                                      | Bax                | ↓ |                                                                                                                                                                   |            |                   |
| Anti-apoptotic B-cell lymphoma-2                                                | Bcl-2              | ↑ |                                                                                                                                                                   |            |                   |
| Interleukin 1 beta                                                              | IL-1beta (IL-1B)   | ↓ |                                                                                                                                                                   |            |                   |
| Interleukin-6 (Interferon beta 2)                                               | IL-6 (IFNB2)       | ↓ |                                                                                                                                                                   |            |                   |
| Macrophage inflammatory protein-2 (Chemokine [C-X-C motif] ligand 2)            | MIP-2 (CXCL2)      | ↓ |                                                                                                                                                                   |            |                   |
| Monocyte chemotactic protein 1 (CC chemokine ligand 2 )                         | MCP-1 (CCL2)       | ↓ |                                                                                                                                                                   |            |                   |
| Matrix Metalloproteinase-9 (92 kDa gelatinase; <u>gelatinase B</u> )            | MMP9 (GELB)        | ↓ | Hyperbaric oxygenation reduces long-term brain injury and ameliorates behavioral function by suppression of apoptosis in a rat model of neonatal hypoxia-ischemia | Exp (Rats) | Liu 2013 [82]     |
| Zonula occludens-1 (Tight junction protein-1)                                   | ZO-1 (TJP-1)       | ↑ |                                                                                                                                                                   |            |                   |
| Claudin-5                                                                       | CLDN5              | ↑ |                                                                                                                                                                   |            |                   |
| Caspase-3 (Cystein aspartic acid protease)                                      | CASP-3             | ↓ |                                                                                                                                                                   |            |                   |
| Apoptosis inducing factor                                                       | AIF                | ↓ |                                                                                                                                                                   |            |                   |

|                                                                                                           |                    |   |                                                                                                                                                                     |            |                    |
|-----------------------------------------------------------------------------------------------------------|--------------------|---|---------------------------------------------------------------------------------------------------------------------------------------------------------------------|------------|--------------------|
| Hypoxia- inducible factor 1-alpha                                                                         | HIF-1alpha (HIF1A) | ↑ | Mechanisms of ischemic tolerance induced by hyperbaric oxygen preconditioning involves upregulation of hypoxia-inducible factor-1aplpha and erythropoietin in rats. | Exp (Rats) | Gu 2008 [43]       |
| Erythropoietin                                                                                            | EPO                | ↑ |                                                                                                                                                                     |            |                    |
| Hypoxia- inducible factor 1-alpha                                                                         | HIF-1alpha (HIF1A) | ↓ | Therapeutic effects of hyperbaric oxygen in a rat model of endothelin-1-induced focal cerebral ischemia                                                             | Exp (Rats) | Huang 2007 [68]    |
| Anti-apoptotic B cell lymphoma-2                                                                          | Bcl-2              | ↑ |                                                                                                                                                                     |            |                    |
| <b>Various</b>                                                                                            |                    |   |                                                                                                                                                                     |            |                    |
| Nuclear factor erythroid 2-related factor 2                                                               | Nrf2               | ↑ | Effect of Nrf2 signaling pathway on the improvement of intestinal epithelial barrier dysfunction by hyperbaric oxygen treatment after spinal cord injury.           | Exp (Rats) | Liu 2021 [36]      |
| Heme oxygenase-1                                                                                          | HO-1 (HMOX1)       | ↑ |                                                                                                                                                                     |            |                    |
| NADH-quinone oxyreductase-1                                                                               | NQO-1              | ↑ |                                                                                                                                                                     |            |                    |
| Glutamate cysteine ligase catalytic subunit (Gamma-glutamylcysteine synthetase )                          | GCLC               | ↑ |                                                                                                                                                                     |            |                    |
| Claudin-1                                                                                                 | CLDN1              | ↑ |                                                                                                                                                                     |            |                    |
| E-Cadherin (epithelial calcium adhering protein)                                                          | ECAD               | ↑ |                                                                                                                                                                     |            |                    |
| Superoxide dismutase                                                                                      | SOD                | ↑ |                                                                                                                                                                     |            |                    |
| Glutathione                                                                                               | GSH                | ↑ |                                                                                                                                                                     |            |                    |
| Malondialdehyde (Propandial)                                                                              | MDA                | ↓ |                                                                                                                                                                     |            |                    |
| Tight-junction proteins                                                                                   | TJ-proteins        | ↑ | Hyperbaric oxygen treatment improves intestinal barrier function after spinal cord injury in rats.                                                                  | Exp (Rats) | Liu 2020 [32]      |
| Zonula occludens-1 (Tight junction protein-1)                                                             | ZO-1 (TJP-1)       | ↑ |                                                                                                                                                                     |            |                    |
| Occludin                                                                                                  | OCLN               | ↑ |                                                                                                                                                                     |            |                    |
| Rho-Kinase 1                                                                                              | ROCK1              | ↓ |                                                                                                                                                                     |            |                    |
| Glutathione (reduced)                                                                                     | GSH                | ↑ | Hyperbaric oxygenation improves redox control and reduces mortality in the acute phase of myocardial infarction in a rat model.                                     | Exp (Rats) | Oliveira 2020 [53] |
| Superoxide dismutase                                                                                      | SOD                | ↑ |                                                                                                                                                                     |            |                    |
| Catalase                                                                                                  | CAT                | ↑ |                                                                                                                                                                     |            |                    |
| 3-Nitrotyrosine                                                                                           | 3-Nitrotyrosine    | ↓ |                                                                                                                                                                     |            |                    |
| Micro-RNA 92a                                                                                             | Mir-92a            | ↓ | Hyperbaric oxygen-induced long non-coding RNA MALAT1 exosomes suppress MicroRNA-92a expression in a rat model of acute myocardial infarction                        | Exp (Rats) | Shyu 2020 [19]     |
| Metastasis associated lung adenocarcinoma transcript 1 (noncoding nuclear-enriched abundant transcript 2) | MALAT 1 (NEAT 2)   | ↑ |                                                                                                                                                                     |            |                    |



|                                                                                  |                       |   |                                                                                                                                                                                |                                   |                                  |
|----------------------------------------------------------------------------------|-----------------------|---|--------------------------------------------------------------------------------------------------------------------------------------------------------------------------------|-----------------------------------|----------------------------------|
| Platelet endothelial cell adhesion molecule 1<br>(Cluster of differentiation 31) | PECAM 1<br>(CD 31)    | ↑ |                                                                                                                                                                                |                                   |                                  |
| Krüppel-like factor 2                                                            | KLF-2                 | ↑ |                                                                                                                                                                                |                                   |                                  |
| Malondialdehyde (Propandial)                                                     | MDA                   | ↓ | Protective effects of hyperbaric oxygen preconditioning against LPS-induced acute lung injury in rats.                                                                         | Exp<br>(Rats)                     | Bai<br>2018<br>[29]              |
| Myeloperoxidase                                                                  | MPO                   | ↓ |                                                                                                                                                                                |                                   |                                  |
| Superoxide dismutase                                                             | SOD                   | ↑ |                                                                                                                                                                                |                                   |                                  |
| Nuclear factor KappaB                                                            | NF-KappaB             | ↓ |                                                                                                                                                                                |                                   |                                  |
| Nuclear factor erythroid 2-related factor 2                                      | NRF-2                 | ↑ |                                                                                                                                                                                |                                   |                                  |
| Heme oxygenase 1                                                                 | HO-1 (HMOX1)          | ↑ |                                                                                                                                                                                |                                   |                                  |
| NADH-quinone oxyreductase-1                                                      | NQO1                  | ↑ |                                                                                                                                                                                |                                   |                                  |
| Hypoxia- inducible factor 1-alpha                                                | HIF-1alpha<br>(HIF1A) | ↑ | Inhibition of hypoxia-associated response and kynurenine production in response to hyperbaric oxygen as mechanism involved in protection against experimental cerebral malaria | Exp<br>(Mice)                     | Bastos<br>2018<br>[53]           |
| Kynurenine                                                                       | Kynurenine            | ↓ |                                                                                                                                                                                |                                   |                                  |
| Interleukin 1 beta                                                               | IL-1beta (IL-1B)      | ↓ | Hyperbaric oxygen protects mandibular condylar chondrocytes from interleukin-1β-induced apoptosis via the PI3K/Akt signaling pathway                                           | Exp<br>Chondro-<br>cytes<br>(Rat) | Chen<br>2016<br>[20]             |
| Protein kinase B                                                                 | Akt                   | ↑ |                                                                                                                                                                                |                                   |                                  |
| Phosphoinositid 3 Kinase                                                         | PI3K                  | ↑ |                                                                                                                                                                                |                                   |                                  |
| COL2A1-gene                                                                      | COL2A1                | ↑ |                                                                                                                                                                                |                                   |                                  |
| Wnt family member 3a                                                             | Wnt 3a                | ↑ | Effects of hyperbaric oxygen on the osteogenic differentiation of mesenchymal stem cells                                                                                       | Exp<br>(human<br>stem<br>cells)   | Lin<br>2014<br>[13]              |
| Beta Catenin-1                                                                   | CTNNB1                | ↑ |                                                                                                                                                                                |                                   |                                  |
| Runt-related transcription factor 2                                              | Runx 2                | ↑ |                                                                                                                                                                                |                                   |                                  |
| Glycogen synthase kinase-3                                                       | GSK 3 Beta            | ↓ |                                                                                                                                                                                |                                   |                                  |
| Transforming growth factor β                                                     | TGFβ                  | ↓ | Gene expression analysis reveals inhibition of radiation-induced TGFβ-signaling by hyperbaric oxygen therapy in mouse salivary glands                                          | Exp<br>(Mice)                     | Spiegel-<br>berg<br>2014<br>[85] |
| Receptor activator of NF-KappaB                                                  | RANK                  | ↓ | Hyperbaric oxygen therapy suppresses osteoclast formation and bone resorption                                                                                                  | Exp<br>(human<br>cells)           | Al Hadi<br>2013<br>[12]          |
| Nuclear factor of activated T-cells, cytoplasmic 1                               | NFATc1                | ↓ |                                                                                                                                                                                |                                   |                                  |
| Dendritic cell-specific transmembrane proteine                                   | Dc-STAMP              | ↓ |                                                                                                                                                                                |                                   |                                  |

|                                                              |                           |   |                                                                                                                                 |          |        |
|--------------------------------------------------------------|---------------------------|---|---------------------------------------------------------------------------------------------------------------------------------|----------|--------|
| Hypoxia- inducible factor 1-alpha                            | HIF-1alpha<br>(HIF1A)     | ↓ |                                                                                                                                 |          |        |
| Glutathione (reduced)                                        | GSH                       | ↑ | Chronic hyperbaric oxygen treatment elicits an anti-oxidant response and attenuates atherosclerosis in apoE knockout mice       | Exp      | Kudcho |
| Glutathione Peroxidase                                       | GSH-Px                    | ↑ |                                                                                                                                 | (ApoE    | dkar   |
| Thiobarbituric acid reactive substances                      | TBARS                     | ↓ |                                                                                                                                 | knockout | 2007   |
| Catalase                                                     | CAT                       | ↑ |                                                                                                                                 | mice)    | [66]   |
| Heme oxygenase 1                                             | HO-1 (HMOX1)              | ↑ | Hyperbaric oxygen attenuation of lipopolysaccharide-induced acute lung injury involves heme oxygenase-1                         | Exp      | Huang  |
| Inducible nitric oxide synthase<br>(Nitric oxide synthase 2) | i-NOS (NOS-2,<br>HEP-NOS) | ↓ |                                                                                                                                 | (Rats)   | 2005   |
| Heme oxygenase 1                                             | HO-1 (HMOX1)              | ↑ | Involvement of heme oxygenase-1 (HO-1) in the adaptive protection of human lymphocytes after hyperbaric oxygen (HBO) treatment. |          | [70]   |
|                                                              |                           |   |                                                                                                                                 | Exp      | Roth-  |
|                                                              |                           |   |                                                                                                                                 | (human   | fuss   |
|                                                              |                           |   |                                                                                                                                 | lymphocy | 2001   |
|                                                              |                           |   |                                                                                                                                 | tes)     | [14]   |
